# Supplementary material for: Independent Component Analysis Reveals the Transcriptional Regulatory Modules in Bradyrhizobium diazoefficiens USDA110
Source: MDPI journal article supplement (doi:10.3390/ijms241612544), 2023-08-08
Supplement: s1 [file s1]

## Supplementary Notes

### The identified 64 iModulons

#### 1. FixK<sub>2</sub>-2 iModulon (n = 174, explained variance: 11.6%)

**Category: Regulatory iModulon (MR and RR of 0.31 and 0.54, poorly-matched)**

**Inferred role: Oxidative adaptation**

**Related regulators: FixK<sub>2</sub>**

Top five genes with highest weights:

| Locus tag | Gene weight | Gene name | Gene product                                  |
|-----------|-------------|-----------|-----------------------------------------------|
| bsr5273   | 0.164988    | bsr5273   | hypothetical protein                          |
| bsr6066   | 0.140447    | bsr6066   | hypothetical protein                          |
| blr4638   | 0.132135    | blr4638   | unknown                                       |
| blr4637   | 0.13115     | blr4637   | Hsp20/alpha crystallin family protein         |
| bsr7036   | 0.12836     | napE      | periplasmic nitrate reductase%2C NapE protein |

#### 2. NifA/RpoN iModulon (n = 158, explained variance: 9.8%)

**Category: Regulatory iModulon (MR and RR of 0.18 and 0.94, Regulon discovery)**

**Inferred role: Nitrogen fixation**

**Related regulators: NifA/RpoN**

Top five genes with highest weights:

| Locus tag | Gene weight | Gene name | Gene product              |
|-----------|-------------|-----------|---------------------------|
| blr2106   | 0.173881    | ectC      | ectoine synthase          |
| blr2143   | 0.162643    | blr2143   | cytochrome P450           |
| blr2146   | 0.135722    | blr2146   | SDR family oxidoreductase |
| blr2132   | 0.128059    | blr2132   | MFS transporter           |
| bsr1758   | 0.124131    | bsr1758   | unknown                   |

**3. Null-2 iModulon (n = 0, explained variance: 9.1%)**

**4. Flagella iModulon (n = 46, explained variance: 4.1%)**

**Category: Functional iModulon**

**Inferred role: Flagella synthesis**

**Related regulators: Unknown**

Top five genes with highest weights:

| Locus tag | Gene weight | Gene name | Gene product                             |
|-----------|-------------|-----------|------------------------------------------|
| bll6855   | 0.179196    | flaF      | flagellar biosynthesis regulator FlaF    |
| bll6871   | 0.169093    | flgI      | flagellar basal body P-ring protein FlgI |

|         |          |      |                                          |
|---------|----------|------|------------------------------------------|
| bll6875 | 0.167821 | flgC | flagellar basal body rod protein FlgC    |
| bll6857 | 0.163486 | flgK | flagellar hook-associated protein FlgK   |
| bll6856 | 0.155349 | flgL | flagellar hook-associated family protein |

## 5. NnrR iModulon (n = 48, explained variance: 3.8%)

**Category: Regulatory iModulon (MR and RR of 0.33 and 0.7, Regulon discovery)**

**Inferred role: Nitrogen metabolism**

**Related regulators: NnrR**

Top five genes with highest weights:

| Locus tag | Gene weight | Gene name | Gene product                                  |
|-----------|-------------|-----------|-----------------------------------------------|
| blr3216   | 0.126556    | norQ      | CbbQ/NirQ/NorQ/GpvN family protein            |
| blr3225   | 0.121794    | blr3225   | SDR family oxidoreductase                     |
| blr3212   | 0.120507    | norE      | cytochrome c oxidase subunit 3 family protein |
| blr3224   | 0.118598    | blr3224   | ABC transporter ATP-binding protein           |
| blr3215   | 0.116001    | norB      | cbb3-type cytochrome c oxidase subunit I      |

## 6. T3SS iModulon (n = 45, explained variance: 3.6%)

**Category: Functional iModulon**

**Inferred role: T3SS system**

**Related regulators: Unknown**

Top five genes with highest weights:

| Locus tag | Gene weight | Gene name | Gene product                  |
|-----------|-------------|-----------|-------------------------------|
| bll1844   | 0.106808    | bll1844   | unknown                       |
| bll1804   | 0.106583    | bll1804   | hypothetical protein          |
| bll2065   | 0.099323    | icfA      | carbonic anhydrase            |
| bll2066   | 0.098801    | bll2066   | thermonuclease family protein |
| bll2047   | 0.097987    | bll2047   | unknown                       |

## **7. Phenylalanine iModulon (n = 25, explained variance: 3.6%)**

**Category: Functional iModulon**

**Inferred role: Aromatic acid catabolism**

**Related regulators: Unknown**

Top five genes with highest weights:

| Locus tag | Gene weight | Gene name | Gene product            |
|-----------|-------------|-----------|-------------------------|
| bll4766   | 0.13055     | bll4766   | TonB-dependent receptor |

|         |          |         |                                                         |
|---------|----------|---------|---------------------------------------------------------|
| bll0332 | 0.119992 | bll0332 | transporter substrate-binding domain-containing protein |
| blr3167 | 0.114482 | hyi     | hydroxypyruvate isomerase                               |
| bll0333 | 0.10538  | bll0333 | PQQ-dependent methanol/ethanol family dehydrogenase     |
| blr3278 | 0.098699 | blr3278 | unknown                                                 |

## 8. Irr iModulon (n = 51, explained variance: 2.7%)

**Category: Regulatory iModulon (MR and RR of 0.31 and 0.8, Regulon discovery)**

**Inferred role: Inorganic ion transport and metabolism**

**Related regulators: Irr**

Top five genes with highest weights:

| Locus tag | Gene weight | Gene name | Gene product                                    |
|-----------|-------------|-----------|-------------------------------------------------|
| bsr3556   | 0.211146    | bsr3556   | unknown                                         |
| bll4920   | 0.165991    | bll4920   | TonB-dependent siderophore receptor             |
| bll7074   | 0.15866     | hutX      | heme utilization cytosolic carrier protein HutX |
| blr7296   | 0.157585    | blr7296   | hypothetical protein                            |
| blr3555   | 0.155132    | fcuA      | unknown                                         |

## 9. Null-3 iModulon (n = 0, explained variance: 2.2%)

**10. Bacterial\_chemotaxis iModulon (n = 163, explained variance: 2.1%)**

**Category: Functional iModulon**

**Inferred role: Multiple stress related response**

**Related regulators: Unknown**

Top five genes with highest weights:

| Locus tag | Gene weight | Gene name | Gene product            |
|-----------|-------------|-----------|-------------------------|
| blr2344   | 0.078455    | cheWII    | chemotaxis protein CheW |
| bll4664   | 0.073031    | bll4664   | hypothetical protein    |
| blr2539   | 0.068534    | blr2539   | cell wall hydrolase     |
| bll6609   | 0.065634    | bll6609   | hypothetical protein    |
| blr2194   | 0.06452     | cheY      | response regulator      |

**11. XylR/bll3916 iModulon (n = 203, explained variance: 2.0%)**

**Category: Regulatory iModulon (MR and RR of 0.04 and 0.47, poorly-matched)**

**Inferred role: Sugar catabolism**

**Related regulators: XylR/bll3916**

Top five genes with highest weights:

| Locus tag | Gene weight | Gene name | Gene product |
|-----------|-------------|-----------|--------------|
|-----------|-------------|-----------|--------------|

|         |          |         |                                                 |
|---------|----------|---------|-------------------------------------------------|
| blr4886 | 0.112859 | blr4886 | ABC transporter permease                        |
| blr7868 | 0.091855 | blr7868 | sugar ABC transporter substrate-binding protein |
| blr7867 | 0.080423 | blr7867 | ABC transporter permease                        |
| bll4784 | 0.07756  | bll4784 | aldehyde dehydrogenase                          |
| blr6446 | 0.07659  | blr6446 | ABC transporter substrate-binding protein       |

## 12. Translation-2 iModulon (n = 4, explained variance: 1.8%)

**Category: Functional iModulon**

**Inferred role: Protein synthesis**

**Related regulators: Unknown**

Top four genes with highest weights:

| Locus tag | Gene weight | Gene name | Gene product                      |
|-----------|-------------|-----------|-----------------------------------|
| blr4582   | 0.096446    | argD      | acetylornithine transaminase      |
| bll5385   | 0.077776    | rplF      | 50S ribosomal protein L6          |
| bsl5891   | 0.077205    | bsl5891   | DUF3311 domain-containing protein |
| blr3719   | -0.088141   | blr3719   | unknown                           |

## 13. FixK<sub>2</sub>-1 iModulon (n = 122, explained variance: 1.5%)

**Category: Regulatory iModulon (MR and RR of 0.19 and 0.23, poorly-matched)**

**Inferred role: Oxidative adaptation**

**Related regulators: FixK<sub>2</sub>**

Top five genes with highest weights:

| Locus tag | Gene weight | Gene name | Gene product             |
|-----------|-------------|-----------|--------------------------|
| bll2515   | 0.118655    | bll2515   | PEP-utilizing enzyme     |
| blr3464   | 0.100137    | blr3464   | phasin                   |
| blr7874   | 0.090421    | blr7874   | ABC transporter permease |
| blr3478   | 0.085555    | blr3478   | hypothetical protein     |
| blr3482   | 0.078109    | blr3482   | hypothetical protein     |

#### **14. Multiple\_stress iModulon (n = 38, explained variance: 1.5%)**

**Category: Functional iModulon**

**Inferred role: Multiple stress response, Hydrogen peroxide**

**Related regulators: Unknown**

Top five genes with highest weights:

| Locus tag | Gene weight | Gene name | Gene product      |
|-----------|-------------|-----------|-------------------|
| bll3418   | 0.167848    | bll3418   | epoxide hydrolase |



|         |          |         |                                                   |
|---------|----------|---------|---------------------------------------------------|
| bl13417 | 0.162321 | bl13417 | carboxymuconolactone decarboxylase family protein |
| bl12772 | 0.155789 | bl12772 | cupin domain-containing protein                   |
| bl17429 | 0.14325  | bl17429 | sulfite exporter TauE/SafE family protein         |
| bl13419 | 0.139741 | bl13419 | VOC family protein                                |

### 15. Cell\_mobility iModulon (n = 160, explained variance: 1.4%)

**Category: Functional iModulon**

**Inferred role: Cell mobility**

**Related regulators: Unknown**

Top five genes with highest weights:

| Locus tag | Gene weight | Gene name | Gene product                                           |
|-----------|-------------|-----------|--------------------------------------------------------|
| blr7434   | 0.164645    | blr7434   | nuclear transport factor 2 family protein              |
| blr5652   | 0.147191    | blr5652   | metalloregulator ArsR/SmtB family transcription factor |
| blr2836   | 0.125631    | blr2836   | ABC transporter permease                               |
| bl13089   | 0.120401    | bl13089   | MFS transporter                                        |
| bsr4273   | 0.117379    | bsr4273   | hypothetical protein                                   |

### 16. Unchar-5 iModulon (n = 23, explained variance: 1.4%)

**Category: Uncharacterized iModulon**

**Inferred role: Unknown**

**Related regulators: Unknown**

Top five genes with highest weights:

| Locus tag | Gene weight | Gene name | Gene product                          |
|-----------|-------------|-----------|---------------------------------------|
| bsl1637   | 0.197012    | bsl1637   | unknown                               |
| bll1858   | 0.172581    | bll1858   | effector protein NopP                 |
| bll2004   | 0.170716    | bll2004   | unknown                               |
| blr1880   | 0.160811    | blr1880   | LuxR family transcriptional regulator |
| blr1638   | 0.146932    | blr1638   | unknown                               |

**17. HrcA iModulon (n = 126, explained variance: 1.2%)**

**Category: Regulatory iModulon (MR and RR of 0.04 and 0.71, Regulon discovery)**

**Inferred role: Chaperone**

**Related regulators: HrcA**

Top five genes with highest weights:

| Locus tag | Gene weight | Gene name | Gene product         |
|-----------|-------------|-----------|----------------------|
| blr5228   | 0.142238    | blr5228   | hypothetical protein |

|         |          |         |                                       |
|---------|----------|---------|---------------------------------------|
| blr5229 | 0.138171 | blr5229 | unknown                               |
| blr5222 | 0.135983 | blr5222 | ETC complex I subunit                 |
| blr5233 | 0.130928 | hspB    | Hsp20 family protein                  |
| blr5234 | 0.127476 | hspC    | Hsp20/alpha crystallin family protein |

#### **18. blI2166 iModulon (n = 49, explained variance: 1.2%)**

**Category: Regulatory iModulon (MR and RR of 0.06 and 0.5, poorly-matched)**

**Inferred role: Amino acid transport**

**Related regulators: blI2166**

Top five genes with highest weights:

| <b>Locus tag</b> | <b>Gene weight</b> | <b>Gene name</b> | <b>Gene product</b>                                     |
|------------------|--------------------|------------------|---------------------------------------------------------|
| blI7930          | 0.090562           | blI7930          | ABC transporter ATP-binding protein                     |
| blr2167          | 0.073383           | blr2167          | glucose 1-dehydrogenase                                 |
| blr7589          | 0.063854           | blr7589          | indolepyruvate ferredoxin oxidoreductase family protein |
| blI7929          | 0.063778           | blI7929          | ABC transporter ATP-binding protein                     |
| blr2170          | 0.063525           | blr2170          | TRAP transporter substrate-binding protein              |

#### **19. PhyR/EcfG-1 iModulon (n = 116, explained variance: 1.1%)**

**Category: Regulatory iModulon (MR and RR of 0.31 and 1.0, Regulon discovery)**

**Inferred role: Multiple stress**

**Related regulators: PhyR**

Top five genes with highest weights:

| Locus tag | Gene weight | Gene name | Gene product                                |
|-----------|-------------|-----------|---------------------------------------------|
| blr7797   | 0.199154    | blr7797   | sigma-70 family RNA polymerase sigma factor |
| bll1466   | 0.192353    | bll1466   | DUF883 family protein                       |
| bll7795   | 0.164341    | phyR      | response regulator                          |
| bsr2400   | 0.163693    | bsr2400   | hypothetical protein                        |
| bsl1473   | 0.160273    | bsl1473   | CsbD family protein                         |

## **20. Genomic-1 iModulon (n = 1, explained variance: 1.0%)**

**Category: Genomic iModulon**

**Inferred role: FixK deletion**

**Related regulators: Unknown**

Weight of the only gene:

| Locus tag | Gene weight | Gene name | Gene product                               |
|-----------|-------------|-----------|--------------------------------------------|
| bll6061   | 0.113421    | fixK      | helix-turn-helix domain-containing protein |

**21. Unchar-19 iModulon (n = 13, explained variance: 1.0%)**

**Category: Uncharacterized iModulon**

**Inferred role: Unknown**

**Related regulators: Unknown**

Top five genes with highest weights:

| Locus tag | Gene weight | Gene name | Gene product                                       |
|-----------|-------------|-----------|----------------------------------------------------|
| blr3719   | 0.116722    | blr3719   | unknown                                            |
| bll0197   | -0.064567   | bll0197   | branched-chain amino acid ABC transporter permease |
| bll7322   | -0.064596   | bll7322   | Bax inhibitor-1/YccA family protein                |
| blr7167   | -0.065171   | blr7167   | hypothetical protein                               |
| bll0198   | -0.071288   | bll0198   | amidase                                            |

**22. Unchar-15 iModulon (n = 5, explained variance: 0.9%)**

**Category: Uncharacterized iModulon**

**Inferred role: Unknown**

**Related regulators: Unknown**

Top five genes with highest weights:

| Locus tag | Gene weight | Gene name | Gene product         |
|-----------|-------------|-----------|----------------------|
| bsl2713   | 0.067252    | bsl2713   | unknown              |
| blr4630   | 0.060321    | blr4630   | hypothetical protein |
| bsl7703   | 0.058516    | bsl7703   | unknown              |
| bll7668   | 0.058477    | bll7668   | unknown              |
| blr5171   | 0.056941    | blr5171   | hypothetical protein |

### 23. Translation-1 iModulon (n = 53, explained variance: 0.9%)

**Category: Functional iModulon**

**Inferred role: Protein synthesis**

**Related regulators: Unknown**

Top five genes with highest weights:

| Locus tag | Gene weight | Gene name | Gene product                                    |
|-----------|-------------|-----------|-------------------------------------------------|
| bsr6735   | 0.073068    | pqqA      | pyrroloquinoline quinone precursor peptide PqqA |
| bll5076   | 0.072999    | bll5076   | porin                                           |
| bll5511   | 0.069656    | bll5511   | unknown                                         |
| bll5085   | 0.068948    | bll5085   | unknown                                         |
| blr4701   | 0.066887    | blr4701   | outer membrane beta-barrel protein              |

#### **24. Copper iModulon (n = 24, explained variance: 0.8%)**

**Category: Functional iModulon**

**Inferred role: Metal related response**

**Related regulators: Unknown**

Top five genes with highest weights:

| Locus tag | Gene weight | Gene name | Gene product                      |
|-----------|-------------|-----------|-----------------------------------|
| bll4881   | 0.23423     | bll4881   | TonB-dependent receptor           |
| bll4879   | 0.155451    | bll4879   | YcnI family protein               |
| bll4880   | 0.142624    | bll4880   | copper chaperone PCu(A)C          |
| bll4882   | 0.121918    | bll4882   | DUF2946 domain-containing protein |
| bll4878   | 0.120421    | bll4878   | CopD family protein               |

#### **25. Sulfur-1 iModulon (n = 39, explained variance: 0.7%)**

**Category: Functional iModulon**

**Inferred role: Sulfur metabolism**

**Related regulators: Unknown**

Top five genes with highest weights:

| Locus tag | Gene weight | Gene name | Gene product                                      |
|-----------|-------------|-----------|---------------------------------------------------|
| bll6452   | 0.182832    | acd       | acyl-CoA/acyl-ACP dehydrogenase                   |
| bll6455   | 0.18223     | bll6455   | ABC transporter substrate-binding protein         |
| bll6454   | 0.158087    | bll6454   | ABC transporter permease subunit                  |
| bll7009   | 0.151427    | ssuC      | aliphatic sulfonate ABC transporter permease SsuC |
| bll7008   | 0.142211    | bll7008   | ATP-binding cassette domain-containing protein    |

## 26. Glyoxylate iModulon (n = 70, explained variance: 0.7%)

**Category: Functional iModulon**

**Inferred role: Glyoxylate and dicarboxylate metabolism**

**Related regulators: Unknown**

Top five genes with highest weights:

| Locus tag | Gene weight | Gene name | Gene product                                                         |
|-----------|-------------|-----------|----------------------------------------------------------------------|
| bll0904   | 0.255885    | regR      | ActR/PrrA/RegA family redox response regulator transcription factor  |
| blr1516   | 0.177526    | acrB      | multidrug efflux RND transporter permease subunit                    |
| blr1515   | 0.170574    | acrA      | efflux RND transporter periplasmic adaptor subunit                   |
| bll6513   | 0.151516    | bll6513   | tripartite tricarboxylate transporter substrate binding protein BugD |
| bll2087   | 0.150236    | bll2087   | DUF5695 domain-containing protein                                    |



**27. Denitrification iModulon (n = 11, explained variance: 0.6%)**

**Category: Functional iModulon**

**Inferred role: Denitrification**

**Related regulators: Unknown**

Top five genes with highest weights:

| Locus tag | Gene weight | Gene name         | Gene product                                 |
|-----------|-------------|-------------------|----------------------------------------------|
| bll2757   | 0.191972    | fixK <sub>2</sub> | helix-turn-helix domain-containing protein   |
| bll4640   | 0.177432    | bll4640           | CBS domain-containing protein                |
| blr1508   | 0.124139    | blr1508           | ABC transporter ATP-binding protein/permease |
| blr4641   | 0.122275    | blr4641           | c-type cytochrome                            |
| blr2231   | 0.104845    | blr2231           | unknown                                      |

**28. Noise iModulon (n = 2, explained variance: 0.6%)**

**Category: Noise**

**29. T6SS iModulon (n = 43, explained variance: 0.5%)**

**Category: Functional iModulon**

**Inferred role: T6SS system**

**Related regulators: Unknown**

Top five genes with highest weights:

| Locus tag | Gene weight | Gene name | Gene product                                      |
|-----------|-------------|-----------|---------------------------------------------------|
| bll1028   | 0.210422    | carQ      | sigma-70 family RNA polymerase sigma factor       |
| bll2645   | 0.131034    | bll2645   | class I SAM-dependent methyltransferase           |
| bsl0348   | 0.124052    | bsl0348   | hypothetical protein                              |
| blr7943   | 0.121305    | blr7943   | winged helix-turn-helix domain-containing protein |
| blr3596   | 0.115136    | vgrG      | type VI secretion system tip protein VgrG         |

**30. Signal\_transduction iModulon (n = 23, explained variance: 0.5%)**

**Category: Functional iModulon**

**Inferred role: Signal transduction mechanisms**

**Related regulators: Unknown**

Top five genes with highest weights:

| Locus tag | Gene weight | Gene name | Gene product                 |
|-----------|-------------|-----------|------------------------------|
| blr3174   | 0.078549    | blr3174   | flagellar basal body protein |

|         |          |         |                                          |
|---------|----------|---------|------------------------------------------|
| bl17580 | 0.074057 | bl17580 | unknown                                  |
| bsr5798 | 0.073848 | bsr5798 | unknown                                  |
| blr0842 | 0.071932 | blr0842 | HD domain-containing protein             |
| blr5569 | 0.071145 | blr5569 | transglutaminase-like cysteine peptidase |

### 31. Sulfur-2 iModulon (n = 4, explained variance: 0.4%)

**Category: Functional iModulon**

**Inferred role: Sulfur metabolism**

**Related regulators: Unknown**

Top four genes with highest weights:

| Locus tag | Gene weight | Gene name | Gene product                    |
|-----------|-------------|-----------|---------------------------------|
| blr7556   | 0.091301    | blr7556   | alpha/beta hydrolase            |
| bl15738   | 0.089557    | bl15738   | OsmC family protein             |
| bl15736   | 0.08305     | bl15736   | sulfurtransferase               |
| bl14570   | 0.072865    | bl14570   | sulfite reductase subunit alpha |

### 32. Unchar-20 iModulon (n = 17, explained variance: 0.4%)

**Category: Uncharacterized iModulon**

**Inferred role: Unknown**

**Related regulators: Unknown**

Top five genes with highest weights:

| Locus tag | Gene weight | Gene name | Gene product                     |
|-----------|-------------|-----------|----------------------------------|
| bsr2110   | 0.081997    | bsr2110   | unknown                          |
| bsr3155   | 0.080973    | bsr3155   | hypothetical protein             |
| bsr4694   | 0.072384    | bsr4694   | hypothetical protein             |
| bll0046   | 0.070664    | bll0046   | DUF736 domain-containing protein |
| blr3553   | 0.066501    | blr3553   | hypothetical protein             |

**33. Unchar-14 iModulon (n = 83, explained variance: 0.4%)**

**Category: Uncharacterized iModulon**

**Inferred role: Unknown**

**Related regulators: Unknown**

Top five genes with highest weights:

| Locus tag | Gene weight | Gene name | Gene product                        |
|-----------|-------------|-----------|-------------------------------------|
| bll6389   | 0.080399    | bll6389   | amino acid ABC transporter permease |

|         |          |         |                      |
|---------|----------|---------|----------------------|
| bsl8075 | 0.077547 | bsl8075 | hypothetical protein |
| bsr4097 | 0.073936 | bsr4097 | hypothetical protein |
| blr8066 | 0.073484 | blr8066 | hypothetical protein |
| bsr7720 | 0.069323 | bsr7720 | unknown              |

#### **34. Genomic-2 iModulon (n = 8, explained variance: 0.4%)**

**Category: Genomic iModulon**

**Inferred role: mutated nodW gene and an overexpressed nwsB gene**

**Related regulators: Unknown**

Top five genes with highest weights:

| Locus tag | Gene weight | Gene name | Gene product                   |
|-----------|-------------|-----------|--------------------------------|
| bsr4258   | 0.182354    | bsr4258   | XapX domain-containing protein |
| blr4259   | 0.15384     | blr4259   | amidohydrolase                 |
| blr4260   | 0.151778    | blr4260   | DoxX family protein            |
| blr4257   | 0.143049    | blr4257   | hydrolase                      |
| blr4261   | 0.128954    | blr4261   | hypothetical protein           |

#### **35. NodD<sub>2</sub> iModulon (n = 29, explained variance: 0.4%)**

**Category: Regulatory iModulon (MR and RR of 0.24 and 1.0, poorly-matched)**

**Inferred role: Nodulation**

**Related regulators: NodD<sub>2</sub>**

Four genes with their weights:

| Locus tag | Gene weight | Gene name | Gene product                          |
|-----------|-------------|-----------|---------------------------------------|
| blr2026   | 0.226006    | nodB      | chitooligosaccharide deacetylase NodB |
| blr2024   | 0.210995    | nodY      | unknown                               |
| blr2062   | 0.200278    | noeI      | FkbM family methyltransferase         |
| bsl2015   | 0.171269    | nolZ      | unknown                               |
| blr2025   | 0.168993    | nodA      | NodA family N-acyltransferase         |

**36. Unchar-12 iModulon (n = 29, explained variance: 0.3%)**

**Category: Uncharacterized iModulon**

**Inferred role: Unknown**

**Related regulators: Unknown**

Top five genes with highest weights:

| Locus tag | Gene weight | Gene name | Gene product |
|-----------|-------------|-----------|--------------|
|-----------|-------------|-----------|--------------|

|         |          |         |                                 |
|---------|----------|---------|---------------------------------|
| bll2704 | 0.162814 | bll2704 | hypothetical protein            |
| bll6098 | 0.149958 | bll6098 | GNAT family N-acetyltransferase |
| bsl6101 | 0.14277  | bsl6101 | unknown                         |
| bll6102 | 0.133354 | bll6102 | unknown                         |
| bsl6099 | 0.113387 | bsl6099 | hypothetical protein            |

### **37. Leucine iModulon (n = 30, explained variance: 0.3%)**

**Category: Functional iModulon**

**Inferred role: Leucine degradation**

**Related regulators: Unknown**

Top five genes with highest weights:

| Locus tag | Gene weight | Gene name | Gene product                                       |
|-----------|-------------|-----------|----------------------------------------------------|
| bll0889   | 0.174453    | bll0889   | MHS family MFS transporter                         |
| bll0888   | 0.106729    | bll0888   | acyl CoA:acetate/3-ketoacid CoA transferase        |
| bll0883   | 0.086151    | bll0883   | branched-chain amino acid ABC transporter permease |
| bll0884   | 0.077493    | bll0884   | branched-chain amino acid ABC transporter permease |
| bll8294   | 0.071676    | bll8294   | hypothetical protein                               |

**38. BioR iModulon (n = 31, explained variance: 0.3%)**

**Category: Regulatory iModulon (MR and RR of 0.16 and 0.83, Regulon discovery)**

**Inferred role: Biotin metabolism**

**Related regulators: BioR**

Top five genes with highest weights:

| Locus tag | Gene weight | Gene name | Gene product                                       |
|-----------|-------------|-----------|----------------------------------------------------|
| bll3379   | 0.15108     | bll3379   | SRPBCC family protein                              |
| bll3384   | 0.124098    | bll3384   | branched-chain amino acid ABC transporter permease |
| bll3376   | 0.123794    | bll3376   | unknown                                            |
| bll3383   | 0.117503    | bll3383   | ABC transporter ATP-binding protein                |
| bll3374   | 0.108801    | bll3374   | molybdopterin-dependent oxidoreductase             |

**39. bll3348 iModulon (n = 15, explained variance: 0.3%)**

**Category: Functional iModulon**

**Inferred role: Amino acid transportation**

**Related regulators: bll3348**

Top five genes with highest weights:



| Locus tag | Gene weight | Gene name | Gene product                                       |
|-----------|-------------|-----------|----------------------------------------------------|
| blr3351   | 0.256889    | cutM      | FAD binding domain-containing protein              |
| blr3354   | 0.235104    | blr3354   | branched-chain amino acid ABC transporter permease |
| blr3357   | 0.195327    | blr3357   | ABC transporter ATP-binding protein                |
| blr3355   | 0.179847    | blr3355   | branched-chain amino acid ABC transporter permease |
| blr3353   | 0.171464    | blr3353   | ABC transporter substrate-binding protein          |

#### 40. Unchar-23 iModulon (n = 10, explained variance: 0.3%)

**Category: Uncharacterized iModulon**

**Inferred role: Unknown**

**Related regulators: Unknown**

Top five genes with highest weights:

| Locus tag | Gene weight | Gene name | Gene product                                |
|-----------|-------------|-----------|---------------------------------------------|
| bll1028   | 0.130941    | carQ      | sigma-70 family RNA polymerase sigma factor |
| bsr4694   | 0.114292    | bsr4694   | hypothetical protein                        |
| bll6615   | 0.099421    | bll6615   | DUF983 domain-containing protein            |
| blr2475   | 0.097122    | tspO      | tryptophan-rich sensory protein             |
| blr2474   | 0.091157    | blr2474   | fasciclin domain-containing protein         |

**41. Unchar-3 iModulon (n = 62, explained variance: 0.3%)**

**Category: Uncharacterized iModulon**

**Inferred role: Unknown**

**Related regulators: Unknown**

Top five genes with highest weights:

| Locus tag | Gene weight | Gene name | Gene product |
|-----------|-------------|-----------|--------------|
| bll1605   | 0.12884     | bll1605   | unknown      |
| bll1762   | 0.116638    | bll1762   | unknown      |
| bsl7758   | 0.103917    | bsl7758   | unknown      |
| bsl3175   | 0.102297    | bsl3175   | unknown      |
| bsr6130   | 0.096649    | bsr6130   | unknown      |

**42. Calvin\_cycle iModulon (n = 9, explained variance: 0.3%)**

**Category: Functional iModulon**

**Inferred role: Calvin\_cycle**

**Related regulators: Unknown**

Top five genes with highest weights:

| Locus tag | Gene weight | Gene name | Gene product |
|-----------|-------------|-----------|--------------|
|-----------|-------------|-----------|--------------|

|         |          |      |                                                       |
|---------|----------|------|-------------------------------------------------------|
| blr2588 | 0.190628 | rpe  | ribulose-phosphate 3-epimerase                        |
| blr2581 | 0.180744 | cbbF | class 1 fructose-bisphosphatase                       |
| blr2585 | 0.161435 | cbbL | form I ribulose biphosphate carboxylase large subunit |
| blr2586 | 0.158164 | cbbS | ribulose biphosphate carboxylase small subunit        |
| blr2583 | 0.157865 | tkt  | transketolase                                         |

### 43. HutC iModulon (n = 10, explained variance: 0.3%)

**Category: Regulatory iModulon (MR and RR of 0.8 and 1.0, well-matched)**

**Inferred role: Histidine metabolism**

**Related regulators: HutC**

Top five genes with highest weights:

| Locus tag | Gene weight | Gene name | Gene product                              |
|-----------|-------------|-----------|-------------------------------------------|
| bll6243   | 0.232622    | hutI      | imidazolonepropionase                     |
| bll6241   | 0.210829    | hutU      | urocanate hydratase                       |
| blr6246   | 0.20028     | blr6246   | ABC transporter substrate-binding protein |
| blr6244   | 0.193763    | blr6244   | formimidoylglutamate deiminase            |
| blr6247   | 0.192148    | blr6247   | ABC transporter permease                  |

#### **44. Oxidation\_stress iModulon (n = 21, explained variance: 0.2%)**

**Category: Functional iModulon**

**Inferred role: Oxidative stress**

**Related regulators: Unknown**

Top five genes with highest weights:

| <b>Locus tag</b> | <b>Gene weight</b> | <b>Gene name</b> | <b>Gene product</b>                         |
|------------------|--------------------|------------------|---------------------------------------------|
| bll1026          | 0.250415           | bll1026          | thioredoxin family protein                  |
| bll1027          | 0.249054           | bll1027          | cytochrome c biogenesis CcdA family protein |
| blr3038          | 0.246784           | SigD             | sigma-70 family RNA polymerase sigma factor |
| blr7741          | 0.232377           | blr7741          | alpha/beta hydrolase                        |
| bll6527          | 0.193172           | bll6527          | DUF417 family protein                       |

#### **45. Unchar-17 iModulon (n = 16, explained variance: 0.2%)**

**Category: Uncharacterized iModulon**

**Inferred role: Unknown**

**Related regulators: Unknown**

Top five genes with highest weights:

| Locus tag | Gene weight | Gene name | Gene product                                               |
|-----------|-------------|-----------|------------------------------------------------------------|
| blr1812   | 0.072681    | nolB      | hypothetical protein                                       |
| blr6531   | 0.071433    | blr6531   | cyclophilin-like fold protein                              |
| blr0947   | 0.068686    | mtgA      | monofunctional biosynthetic peptidoglycan transglycosylase |
| blr3479   | 0.068274    | blr3479   | hypothetical protein                                       |
| blr1658   | 0.067726    | blr1658   | unknown                                                    |

#### **46. Methane iModulon (n = 14, explained variance: 0.2%)**

**Category: Functional iModulon**

**Inferred role: Methane oxidation**

**Related regulators: Unknown**

Top five genes with highest weights:

| Locus tag | Gene weight | Gene name | Gene product                                                              |
|-----------|-------------|-----------|---------------------------------------------------------------------------|
| blr3678   | 0.180101    | blr3678   | FAD-binding oxidoreductase                                                |
| blr3679   | 0.167302    | blr3679   | aromatic/alkene monooxygenase hydroxylase subunit beta                    |
| blr3681   | 0.166659    | blr3681   | amidohydrolase                                                            |
| blr3675   | 0.157368    | blr3675   | NAD(P)-dependent alcohol dehydrogenase                                    |
| blr3677   | 0.144864    | blr3677   | aromatic/alkene/methane monooxygenase hydroxylase/oxygenase subunit alpha |

**47. Unchar-13 iModulon (n = 21, explained variance: 0.2%)**

**Category: Uncharacterized iModulon**

**Inferred role: Unknown**

**Related regulators: Unknown**

Top five genes with highest weights:

| Locus tag | Gene weight | Gene name | Gene product                     |
|-----------|-------------|-----------|----------------------------------|
| blr4764   | 0.088969    | blr4764   | unknown                          |
| bsr0027   | 0.08018     | bsr0027   | unknown                          |
| blr6967   | 0.070714    | blr6967   | MFS transporter                  |
| bll0046   | 0.062611    | bll0046   | DUF736 domain-containing protein |
| bsl8265   | 0.062461    | bsl8265   | hypothetical protein             |

**48. Unchar-11 iModulon (n = 36, explained variance: 0.2%)**

**Category: Uncharacterized iModulon**

**Inferred role: Unknown**

**Related regulators: Unknown**

Top five genes with highest weights:

| Locus tag | Gene weight | Gene name | Gene product                                     |
|-----------|-------------|-----------|--------------------------------------------------|
| blr4638   | 0.119363    | blr4638   | unknown                                          |
| blr4641   | 0.0989      | blr4641   | c-type cytochrome                                |
| bll4639   | 0.097273    | bll4639   | trypsin-like peptidase domain-containing protein |
| blr4652   | 0.094253    | blr4652   | nitroreductase                                   |
| bll8248   | 0.089078    | bll8248   | unknown                                          |

**49. Null-1 iModulon (n = 0, explained variance: 0.2%)**

**50. Unchar-21 iModulon (n = 18, explained variance: 0.2%)**

**Category: Uncharacterized iModulon**

**Inferred role: Unknown**

**Related regulators: Unknown**

Top five genes with highest weights:

| Locus tag | Gene weight | Gene name | Gene product                               |
|-----------|-------------|-----------|--------------------------------------------|
| bll2172   | 0.067897    | bll2172   | SMP-30/gluconolactonase/LRE family protein |
| blr4764   | 0.064078    | blr4764   | unknown                                    |
| blr8233   | 0.061553    | blr8233   | unknown                                    |
| bll8177   | 0.060331    | bll8177   | AAA family ATPase                          |

|         |          |         |                              |
|---------|----------|---------|------------------------------|
| blI8212 | 0.058562 | blI8212 | FAD-dependent oxidoreductase |
|---------|----------|---------|------------------------------|

### 51. Genomic-3 iModulon (n = 13, explained variance: 0.1%)

**Category: Genomic iModulon**

**Inferred role: Unknown**

**Related regulators: Unknown**

Top five genes with highest weights:

| Locus tag | Gene weight | Gene name | Gene product         |
|-----------|-------------|-----------|----------------------|
| bsI8208   | 0.558865    | bsI8208   | unknown              |
| blI1684   | 0.08263     | blI1684   | hypothetical protein |
| blI5216   | 0.068854    | blI5216   | unknown              |
| bsI5490   | 0.065947    | bsI5490   | hypothetical protein |
| blr3564   | 0.06178     | blr3564   | unknown              |

### 52. Unchar-16 iModulon (n = 35, explained variance: 0.1%)

**Category: Uncharacterized iModulon**

**Inferred role: Unknown**



**Related regulators: Unknown**

Top five genes with highest weights:

| Locus tag | Gene weight | Gene name | Gene product         |
|-----------|-------------|-----------|----------------------|
| bsr3027   | 0.082104    | bsr3027   | unknown              |
| bsr8005   | 0.080878    | bsr8005   | unknown              |
| bll8308   | 0.075974    | bll8308   | hypothetical protein |
| blr3702   | 0.072975    | blr3702   | hypothetical protein |
| bll8227   | 0.072579    | bll8227   | unknown              |

**53. Unchar-9 iModulon (n = 64, explained variance: 0.1%)****Category: Uncharacterized iModulon****Inferred role: Unknown****Related regulators: Unknown**

Top five genes with highest weights:

| Locus tag | Gene weight | Gene name | Gene product                           |
|-----------|-------------|-----------|----------------------------------------|
| bsr1982   | 0.098423    | bsr1982   | unknown                                |
| bll0069   | 0.075158    | bll0069   | ImmA/IrrE family metallo-endopeptidase |
| bll5145   | 0.074028    | bll5145   | unknown                                |

|         |          |         |                      |
|---------|----------|---------|----------------------|
| bll6516 | 0.064643 | bll6516 | chromate transporter |
| blr3548 | 0.062723 | blr3548 | hypothetical protein |

#### **54. Unchar-1 iModulon (n = 58, explained variance: 0.1%)**

**Category: Uncharacterized iModulon**

**Inferred role: Unknown**

**Related regulators: Unknown**

Top five genes with highest weights:

| <b>Locus tag</b> | <b>Gene weight</b> | <b>Gene name</b> | <b>Gene product</b>                        |
|------------------|--------------------|------------------|--------------------------------------------|
| blr4764          | 0.087665           | blr4764          | unknown                                    |
| bsl1111          | 0.087548           | bsl1111          | hypothetical protein                       |
| blr3553          | 0.08388            | blr3553          | hypothetical protein                       |
| bll7174          | 0.078052           | bll7174          | TetR/AcrR family transcriptional regulator |
| blr0854          | 0.077321           | blr0854          | GNAT family N-acetyltransferase            |

#### **55. Unchar-10 iModulon (n = 28, explained variance: 0.1%)**

**Category: Uncharacterized iModulon**

**Inferred role: Unknown**

**Related regulators: Unknown**

Top five genes with highest weights:

| Locus tag | Gene weight | Gene name | Gene product                               |
|-----------|-------------|-----------|--------------------------------------------|
| bll8287   | 0.08176     | trbC      | TrbC/VirB2 family protein                  |
| bll6552   | 0.073243    | bll6552   | DoxX family protein                        |
| bsl2999   | 0.073104    | bsl2999   | unknown                                    |
| blr2827   | 0.062721    | blr2827   | TRAP transporter substrate-binding protein |
| bll0075   | 0.062298    | bll0075   | restriction endonuclease                   |

**56. Unchar-4 iModulon (n = 2, explained variance: 0.1%)**

**Category: Uncharacterized iModulon**

**Inferred role: Unknown**

**Related regulators: Unknown**

Two genes with their weights:

| Locus tag | Gene weight | Gene name | Gene product                              |
|-----------|-------------|-----------|-------------------------------------------|
| bsr1621   | 0.086129    | bsr1621   | DUF2274 domain-containing protein         |
| bll1960   | 0.083093    | bll1960   | ribbon-helix-helix protein%2C CopG family |

**57. PhyR/EcfG-2 iModulon (n = 14, explained variance: 0.1%)**

**Category: Regulatory iModulon (MR and RR of 0.36 and 0.14, poorly-matched)**

**Inferred role: Thermal and dessication stress related response**

**Related regulators: PhyR**

Top five genes with highest weights:

| Locus tag | Gene weight | Gene name | Gene product                                 |
|-----------|-------------|-----------|----------------------------------------------|
| bll7795   | 0.248598    | phyR      | response regulator                           |
| bll3764   | 0.067877    | bll3764   | unknown                                      |
| blr0028   | 0.067839    | blr0028   | acetoacetate decarboxylase family protein    |
| blr1196   | 0.063085    | ohr       | organic hydroperoxide resistance protein     |
| bll8295   | 0.062501    | bll8295   | ABC transporter ATP-binding protein/permease |

**58. AA\_transport iModulon (n = 24, explained variance: 0.1%)**

**Category: Functional iModulon**

**Inferred role: Branched amino acid transportation**

**Related regulators: Unknown**

Top five genes with highest weights:

| Locus tag | Gene weight | Gene name | Gene product                                       |
|-----------|-------------|-----------|----------------------------------------------------|
| blr2924   | 0.167438    | blr2924   | branched-chain amino acid ABC transporter permease |
| blr2921   | 0.161754    | blr2921   | putative hydro-lyase                               |
| blr2926   | 0.157678    | blr2926   | ABC transporter ATP-binding protein                |
| blr2923   | 0.147455    | blr2923   | branched-chain amino acid ABC transporter permease |
| blr2925   | 0.142878    | blr2925   | ABC transporter ATP-binding protein                |

### 59. Unchar-2 iModulon (n = 18, explained variance: 0.1%)

**Category: Uncharacterized iModulon**

**Inferred role: Unknown**

**Related regulators: Unknown**

Top five genes with highest weights:

| Locus tag | Gene weight | Gene name | Gene product         |
|-----------|-------------|-----------|----------------------|
| bsr4178   | 0.094004    | bsr4178   | unknown              |
| bsr1758   | 0.069289    | bsr1758   | unknown              |
| blr4654   | 0.069178    | blr4654   | hypothetical protein |
| blr3565   | 0.068757    | blr3565   | unknown              |
| bll8223   | 0.067656    | bll8223   | hypothetical protein |

**60. Unchar-7 iModulon (n = 124, explained variance: 0.1%)**

**Category: Uncharacterized iModulon**

**Inferred role: Unknown**

**Related regulators: Unknown**

Top five genes with highest weights:

| Locus tag | Gene weight | Gene name | Gene product                          |
|-----------|-------------|-----------|---------------------------------------|
| blr8204   | 0.098849    | blr8204   | unknown                               |
| blr3612   | 0.08525     | blr3612   | unknown                               |
| blr8022   | 0.076594    | ligD      | non-homologous end-joining DNA ligase |
| bll6915   | 0.072148    | bll6915   | Gfo/Idh/MocA family oxidoreductase    |
| bll8212   | 0.065906    | bll8212   | FAD-dependent oxidoreductase          |

**61. Unchar-22 iModulon (n = 18, explained variance: 0.1%)**

**Category: Uncharacterized iModulon**

**Inferred role: Unknown**

**Related regulators: Unknown**

Four genes with their weights:

| Locus tag | Gene weight | Gene name | Gene product                               |
|-----------|-------------|-----------|--------------------------------------------|
| bsl3676   | 0.097353    | bsl3676   | unknown                                    |
| bsr0036   | 0.082354    | bsr0036   | unknown                                    |
| bll0025   | 0.078422    | bll0025   | oleate hydratase                           |
| blr8271   | 0.077065    | blr8271   | helix-turn-helix transcriptional regulator |

## 62. Unchar-6 iModulon (n = 41, explained variance: 0.1%)

**Category: Uncharacterized iModulon**

**Inferred role: Unknown**

**Related regulators: Unknown**

Top five genes with highest weights:

| Locus tag | Gene weight | Gene name | Gene product                                     |
|-----------|-------------|-----------|--------------------------------------------------|
| bsl4812   | 0.084809    | bsl4812   | Flp family type IVb pilin                        |
| bll3228   | 0.071785    | bll3228   | LysR substrate-binding domain-containing protein |
| blr6578   | 0.070588    | blr6578   | ABC transporter permease                         |
| bll2637   | 0.069633    | bll2637   | DUF190 domain-containing protein                 |
| bsr2151   | 0.067647    | bsr2151   | unknown                                          |

**63. Unchar-8 iModulon (n = 53, explained variance: 0.1%)**

**Category: Uncharacterized iModulon**

**Inferred role: Unknown**

**Related regulators: Unknown**

Top five genes with highest weights:

| Locus tag | Gene weight | Gene name | Gene product                                |
|-----------|-------------|-----------|---------------------------------------------|
| blr4630   | 0.089313    | blr4630   | hypothetical protein                        |
| bll0415   | 0.076613    | leuD      | 3-isopropylmalate dehydratase small subunit |
| bsl1708   | 0.075724    | bsl1708   | unknown                                     |
| bll2661   | 0.075163    | bll2661   | DUF2721 domain-containing protein           |
| blr1731   | 0.071016    | hypB      | unknown                                     |

**64. Unchar-18 iModulon (n = 83, explained variance: 0.1%)**

**Category: Uncharacterized iModulon**

**Inferred role: Unknown**

**Related regulators: Unknown**

Top five genes with highest weights:

| Locus tag | Gene weight | Gene name | Gene product |
|-----------|-------------|-----------|--------------|
|-----------|-------------|-----------|--------------|



|         |          |         |                                   |
|---------|----------|---------|-----------------------------------|
| bl1836  | 0.093132 | bl1836  | unknown                           |
| bl18055 | 0.092659 | bl18055 | hypothetical protein              |
| blr3358 | 0.088928 | blr3358 | Rieske (2Fe-2S) protein           |
| bsr0350 | 0.079721 | bsr0350 | unknown                           |
| bsl8315 | 0.079154 | bsl8315 | DUF3892 domain-containing protein |
