# Supplementary material for: Independent Component Analysis Reveals the Transcriptional Regulatory Modules in Bradyrhizobium diazoefficiens USDA110
Source: Int J Mol Sci. 2023 Aug 8;24(16):12544. doi: 10.3390/ijms241612544 (PMC10454721; doi:10.3390/ijms241612544)
Supplement: Supplementary file 1 [file ijms-24-12544-s001.zip]

Archive with 4 entries (4 files):
- Supplementary data file.zip
- Supplementary figures.pdf
- Supplementary notes.pdf
- Supplementary table.xlsx
