# Supplementary material for: Independent Component Analysis Reveals the Transcriptional Regulatory Modules in Bradyrhizobium diazoefficiens USDA110
Source: Int J Mol Sci. 2023 Aug 8;24(16):12544. doi: 10.3390/ijms241612544 (PMC10454721; doi:10.3390/ijms241612544)
Supplement: Supplementary file 1 [file ijms-24-12544-s001.zip › Supplementary table.xlsx]

## Sheet: Supplementary materials3
	Regulator	p-value	q-value	Precision	Recall	F1_score	TP	Regulon_size	iModulon_size	n_regs	iModulon_name	Function	Category	Sub_category	Explained_variance	iModulon_type
Unchar-1	Unchar								58		Unchar-1	Unknown	Uncharacterized	Uncharacterized iModulons	0.0012484	Uncharacterized
T3SS	T3SS								45		T3SS	T3SS system	Structural components	Secretion system	0.0364052	Functional
Unchar-2	Unchar								18		Unchar-2	Unknown	Uncharacterized	Uncharacterized iModulons	0.00103616	Uncharacterized
FixK2-1	FixK2	1.02e-21	8.14e-21	0.188525	0.23	0.207207	23	100	122	1	FixK2-1	Oxidative adaptation	Stress	Oxidative adaptation	0.0149852	Regulatory
bll2166	bll2166	3.94e-06	7.88e-06	0.0612245	0.5	0.109091	3	6	49	1	bll2166	Amino acid transport	Amino acid	Transportation	0.0118333	Regulatory
NifA/RpoN	NifA/RpoN	5.31e-49	4.77e-48	0.183544	0.935484	0.306878	29	31	158	1	NifA;RpoN	Nitrogen fixation	Nitrogen	Nitrogen metabolism	0.0983693	Regulatory
PhyR/EcfG-1	PhyR	6.1e-70	1.83e-69	0.310345	1	0.473684	36	36	116	1	PhyR-1	Multiple stress	Stress	Multiple stress	0.0111361	Regulatory
Denitrification	Denitrification								11		Denitrification	Denitrification	Nitrogen	Nitrogen metabolism	0.00586576	Functional
Null-1	Null								0		Null-1	Null	Uncharacterized	Empty	0.00174512	Uncharacterized
Methane	Methane								14		Methane	Methane oxidation	Carbon	Small carbon catabolism	0.00183069	Functional
Unchar-3	Unchar								62		Unchar-3	Unknown	Uncharacterized	Uncharacterized iModulons	0.0028328	Uncharacterized
Irr	Irr	1.69e-33	3.38e-33	0.313725	0.8	0.450704	16	20	51	1	Irr	Inorganic ion transport and metabolism	Element homeostasis	Iron homeostasis	0.0269387	Regulatory
Multiple_stress	Multiple_stress								38		Multiple_stress-1	Multiple stress response, Hydrogen peroxide	Stress	Multiple stress	0.014684	Functional
bll3348	bll3348								15		bll3348	Amino acid transportation	Amino acid	Transportation	0.00294286	Functional
Unchar-4	Unchar								2		Unchar-4	Unknown	Uncharacterized	Uncharacterized iModulons	0.00110925	Uncharacterized
Genomic-1	Genomic								1		Genomic-1	FixK deletion	Genomic	Genomic iModulon	0.0104279	Genomic
Unchar-5	Unchar								23		Unchar-5	Unknown	Uncharacterized	Uncharacterized iModulons	0.0138381	Uncharacterized
XylR/bll3916	XylR/bll3916	2.15e-10	4.09e-07	0.044335	0.473684	0.0810811	9	19	203	2	XylR/bll3916	Sugar catabolism	Carbon	Sugar catabolism	0.0204368	Regulatory
Genomic-2	Genomic								8		Genomic-2	mutated nodW gene and an overexpressed nwsB gene	Genomic	Genomic iModulon	0.00375746	Genomic
Unchar-6	Unchar								41		Unchar-6	Unknown	Uncharacterized	Uncharacterized iModulons	0.000695241	Uncharacterized
Unchar-7	Unchar								124		Unchar-7	Unknown	Uncharacterized	Uncharacterized iModulons	0.000924196	Uncharacterized
HrcA	HrcA	1.61e-08	4.82e-08	0.0396825	0.714286	0.075188	5	7	126	1	HrcA	Chaeperone	Translation	Post translation	0.0120127	Regulatory
Signal_transduction	Signal_transduction								23		Signal_transduction	Signal transduction mechanisms	Signal transduction	Signal transduction mechanisms	0.00451262	Functional
Leucine	Leucine								30		Leucine	Leucine degradation	Amino acid	Synthesis/degradation	0.00307699	Functional
Flagella	Flagella								46		Flagella	Flagella synthesis	Structural components	Cell mobility	0.0413733	Functional
Translation-1	Translation								53		Translation-1	Protein synthesis	Translation	Translation	0.00911642	Functional
Calvin_cycle	Calvin_cycle								9		Calvin_cycle	Calvin_cycle	Carbon	Carbon fixation	0.00281013	Functional
Unchar-8	Unchar								53		Unchar-8	Unknown	Uncharacterized	Uncharacterized iModulons	0.000664347	Uncharacterized
Oxidation_stress	Oxidation_stress								21		Oxidation_stress	Oxidative stress	Stress	Oxidative stress	0.00224546	Functional
Unchar-9	Unchar								64		Unchar-9	Unknown	Uncharacterized	Uncharacterized iModulons	0.00131286	Uncharacterized
Phenylalanine	Phenylalanine								25		Phenylalanine	Aromatic acid catabolism	Carbon	Aromatics catabolism	0.0358279	Functional
FixK2-2	FixK2	1.77e-66	1.77e-65	0.310345	0.54	0.394161	54	100	174	1	FixK2-2	Oxidative adaptation	Stress	Oxidative adaptation	0.115527	Regulatory
Unchar-10	Unchar								28		Unchar-10	Unknown	Uncharacterized	Uncharacterized iModulons	0.00111213	Uncharacterized
Unchar-11	Unchar								36		Unchar-11	Unknown	Uncharacterized	Uncharacterized iModulons	0.00176281	Uncharacterized
Translation-2	Translation								4		Translation-2	Protein synthesis	Translation	Translation	0.017881	Functional
Null-2	Null								0		Null-2	Null	Uncharacterized	Empty	0.091464	Uncharacterized
HutC	HutC	8.79e-26	8.79e-26	0.8	1	0.888889	8	8	10	1	HutC	Histidine metabolism	Amino acid	Synthesis/degradation	0.00271692	Regulatory
Genomic-3	Genomic								13		Genomic-3	Unknown	Genomic	Genomic iModulon	0.0014046	Genomic
Unchar-12	Unchar								29		Unchar-12	Unknown	Uncharacterized	Uncharacterized iModulons	0.00316569	Uncharacterized
Noise	Noise								2		Noise-1	Noise, cytochrome P450	Uncharacterized	Noisy genes	0.00562696	Uncharacterized
Unchar-13	Unchar								21		Unchar-13	Unknown	Uncharacterized	Uncharacterized iModulons	0.0018268	Uncharacterized
Unchar-14	Unchar								83		Unchar-14	Unknown	Uncharacterized	Uncharacterized iModulons	0.00386395	Uncharacterized
AA_transport	AA_transport								24		AA_transport	Branched amino acid transportation	Amino acid	Transportation	0.00107776	Functional
Glyoxylate	Glyoxylate								70		Glyoxylate	Glyoxylate and dicarboxylate metabolism	Carbon	Carbohydrate metabolism	0.00711712	Functional
Unchar-15	Unchar								5		Unchar-15	Unknown	Uncharacterized	Uncharacterized iModulons	0.00946271	Uncharacterized
NodD2	NodD2	3.13e-18	6.25e-18	0.241379	1	0.388889	7	7	29	1	NodD2	Nodulation	Nitrogen	Symbiosis	0.00358115	Regulatory
NnrR	NnrR	2.66e-32	2.4e-31	0.333333	0.695652	0.450704	16	23	48	1	NnrR	Nitrogen metabolism	Nitrogen	Nitrogen metabolism	0.0379116	Regulatory
Cell_mobility	Cell_mobility								160		Cell_mobility	Cell mobility	Structural components	Cell mobility	0.0139174	Functional
T6SS	T6SS								43		T6SS	T6SS system	Structural components	Secretion system	0.00526289	Functional
Sulfur-1	Sulfur								39		Sulfur-1	Sulfur metabolism	Element homeostasis	Sulfur homeostasis	0.00718268	Functional
Unchar-16	Unchar								35		Unchar-16	Unknown	Uncharacterized	Uncharacterized iModulons	0.00135265	Uncharacterized
Copper	Copper								24		Copper	Metal related response	Element homeostasis	Metal homeostasis	0.00840417	Functional
Unchar-17	Unchar								16		Unchar-17	Unknown	Uncharacterized	Uncharacterized iModulons	0.00192539	Uncharacterized
Bacterial_chemotaxis	Bacterial_chemotaxis								163		Bacterial_chemotaxis	Multiple stress related response	Stress	Multiple stress	0.0211394	Functional
BioR	BioR	3.27e-12	1.63e-11	0.16129	0.833333	0.27027	5	6	31	1	BioR	Biotin metabolism	Amino acid	Metabolism of cofactors and vitamins	0.0029838	Regulatory
Null-3	Null								0		Null-3	Null	Uncharacterized	Empty	0.0215469	Uncharacterized
PhyR/EcfG-2	PhyR	2.36e-09	2.36e-09	0.357143	0.138889	0.2	5	36	14	1	PhyR-2	Thermal and dessication stress related response	Stress	Multiple stress	0.00108111	Regulatory
Unchar-18	Unchar								83		Unchar-18	Unknown	Uncharacterized	Uncharacterized iModulons	0.000652242	Uncharacterized
Unchar-19	Unchar								13		Unchar-19	Unknown	Uncharacterized	Uncharacterized iModulons	0.0102245	Uncharacterized
Unchar-20	Unchar								17		Unchar-20	Unknown	Uncharacterized	Uncharacterized iModulons	0.0042431	Uncharacterized
Sulfur-2	Sulfur								4		Sulfur-2	Sulfur metabolism	Element homeostasis	Sulfur homeostasis	0.00441655	Functional
Unchar-21	Unchar								18		Unchar-21	Unknown	Uncharacterized	Uncharacterized iModulons	0.00166707	Uncharacterized
Unchar-22	Unchar								18		Unchar-22	Unknown	Uncharacterized	Uncharacterized iModulons	0.000921874	Uncharacterized
Unchar-23	Unchar								10		Unchar-23	Unknown	Uncharacterized	Uncharacterized iModulons	0.00289812	Uncharacterized
